# Supplementary material for: Effect of Different Anticoagulant Agents on Immune-Related Genes in Leukocytes Isolated from the Whole-Blood of Holstein Cows
Source: MDPI journal article supplement (doi:10.3390/genes14020406), 2023-02-04
Supplement: s1 [file s1]

**Supplementary Table S1.** GenBank accession number, sequence and amplicon size of primers used to analyze gene expression by quantitative PCR.

| Accession no.  | Gene          | Primers <sup>1</sup> | Primers (5'-3')           | Length (bp) <sup>2</sup> |
|----------------|---------------|----------------------|---------------------------|--------------------------|
| NM_175781.1    | <i>ITGB2</i>  | F.1231               | GACACCCTGAAAGTCACCTACGA   | 108                      |
|                |               | R.1338               | GAAGGTGATCGGGACGTTGAT     |                          |
| BC146107.1     | <i>TLN1</i>   | F.942                | TTCCTGCCCAAGGAGTATGTG     | 100                      |
|                |               | R.1041               | AGCGTACCTTGGCCTCAATCT     |                          |
| XM_015460928.1 | <i>LGALS8</i> | F.576                | CCCGGTCATCCCCTATGTTG      | 100                      |
|                |               | R.675                | CTGGAACCTGTCCGAGTCAC      |                          |
| XM_003586675.4 | <i>LCN2</i>   | F.393                | ACAGTGCGGGTGGTGAACA       | 100                      |
|                |               | R.492                | TCCCGTAAAGGGTGATCTTGA     |                          |
| NM_180998.2    | <i>LTF</i>    | F.631                | CCAGGGAGCTGTGGCTAAAT      | 135                      |
|                |               | R.765                | AAGTATGGTTCCCGGGAGGA      |                          |
| NM_001113725.2 | <i>S100A8</i> | F.19                 | ATTTTGGGGAGACCTGGTGG      | 124                      |
|                |               | R.142                | ACGGCGTGGTAATTCCTTT       |                          |
| NM_174197.2    | <i>TLR2</i>   | F.3182               | CCATGTCTGGAGAGGGTGTT      | 102                      |
|                |               | R.3283               | GGGGACACAAAACAGCACTT      |                          |
| NM_174814.2    | <i>YWHAZ</i>  | F.                   | TGAAAATGAAAGGAGACTACTACCG | 84                       |
|                |               | R.                   | GCTGTGACTGGTCCACAATC      |                          |
| NM_173979.3    | <i>ACTB</i>   | F.258                | ACCAACTGGGACGACATGGA      | 149                      |
|                |               | R.406                | GTCTCGAACATGATCTGGGTCAT   |                          |
| NM_174178.2    | <i>SDHA</i>   | F.                   | CTGAAGCAGGTTTCAACACG      | 113                      |
|                |               | R.                   | GTTGTCCTCCTCCATGTTCC      |                          |
| NM_174093.1    | <i>IL1B</i>   | F.30                 | ATTCTCTCCAGCCAACCTTCATT   | 100                      |
|                |               | R.129                | TTCTCGTCACTGTAGTAAGCCATCA |                          |
| NM_001206735.1 | <i>IL1R</i>   | F.897                | CCCGGGCGATAAAGCTGATT      | 104                      |
|                |               | R.1000               | AAGCCAGGATCCCAAGACCA      |                          |
| NM_173966.3    | <i>TNF</i>    | F.174                | CCAGAGGGAAGAGCAGTCCC      | 114                      |
|                |               | R.287                | TCGGCTACAACGTGGGCTAC      |                          |
| NM_001034034.2 | <i>GAPDH</i>  | F.908                | TTGTCTCCTGCGACTTCAACA     | 103                      |
|                |               | R.1010               | TCGTACCAGGAAATGAGCTTGAC   |                          |

<sup>1</sup> Primer direction (F – forward; R – reverse) and hybridization position on the sequence are highlighted.

<sup>2</sup> Amplicon size in base pair (bp).

**Supplementary Table S2.** Sequencing results obtained from PCR product of *Bos taurus* specific primers for genes under investigation.

| Gene                      | Sequence                                                                                                                     |
|---------------------------|------------------------------------------------------------------------------------------------------------------------------|
| <i>ITGB2</i>              | ATCGAATCGCAGGTGGACAGCCCAGAGGGACTGCGACGGCGTCCAGATCAAC<br>GTCCCGATCACCTTCAAGAGGG                                               |
| <i>TLN1</i>               | ACCCCGTCCGCAATTCCTTCTCTACGTGCAGGCACGAGATGCCTAGGAAATGG<br>CTCCCATCCTGTCTCCTCTGCTAAAGGCC                                       |
| <i>LGALS</i><br>8         | AGCTTGGAACGTTGATTGTACTACGTGGGCATGTTTCCTAGTGACTCGGACAGG<br>TTCCAGA                                                            |
| <i>LCN2</i>               | CATAGTGTACTTCAAGAAGGTTCAAAGGAAAAAGACGTACTTCAAGATCACCC<br>TTTACGGGAA                                                          |
| <i>LTF</i>                | CTCTTTGGCTCTCCCCCGGCCAGAGGGACCTGCTGTTCAAAGACTCTGCTCTT<br>GGTT                                                                |
| <i>S100A</i><br>8         | GTGTGCCATTAACCTCCCTGATTGACGTCTACCACAAGTACTCCCTGAAAAAAG<br>GGAATTACCACGCC                                                     |
| <i>TLR2</i>               | TTAAAAGAGTCACAATAGAAAGCTTAAGGTTTTTCTGGTTCCTTGTTTCACAA<br>CATTTAAATTCGGCGTTAGAATATTTGGATCGTCATAAAAACTTA                       |
| <i>ACTB</i>               | CACTTCTACACGAGCTGCGTGTGGCCCCCTGAGGAGCACCCCGTGCTGCTGAC<br>CGAGGCCCCCTCTGAACCCCAAGGCCAACCGTGAGAAGATGACCCAGATCAT<br>GTTCAGAGACA |
| <i>GAPD</i><br><i>H</i>   | TCTACCTTCGATGCTGGGGCTGGCATTGCCCTCAACGACCACTTTGTCAAGCTC<br>ATTCCTGGTACGAA                                                     |
| <i>IL1B</i>               | ACAGCCATGGCACCGTACCTGAACCCATCAACGAAATGATCGGCTTACGTCAC<br>AGTGGACAGAGCACAATAGCACCCCC                                          |
| <i>IL1R</i><br><i>TNF</i> | TGTGAGTCCAGCTAATGAGACAATGGAAGTGGTCTTGGGATCCTGGCTTACAG<br>TCACTCTCCGGGGCAGCTCCGGTGGTGGGACTCGTATGCCAATGCCCTCATGG<br>AA         |

**Supplementary Table S3.** Average of the amplification efficiencies of the gene used in the study.

| <b>Gene</b>   | <b>Efficiency</b> |
|---------------|-------------------|
| <i>ACTB</i>   | 1.72              |
| <i>GAPDH</i>  | 1.82              |
| <i>IL1B</i>   | 1.78              |
| <i>IL1R</i>   | 1.87              |
| <i>ITGB2</i>  | 1.82              |
| <i>LCN2</i>   | 1.84              |
| <i>LGALS8</i> | 1.84              |
| <i>LTF</i>    | 1.86              |
| <i>S100A8</i> | 1.82              |
| <i>SDHA</i>   | 1.83              |
| <i>TLN1</i>   | 1.79              |
| <i>TLR2</i>   | 1.83              |
| <i>TNF</i>    | 1.77              |
| <i>YWHAZ</i>  | 1.83              |

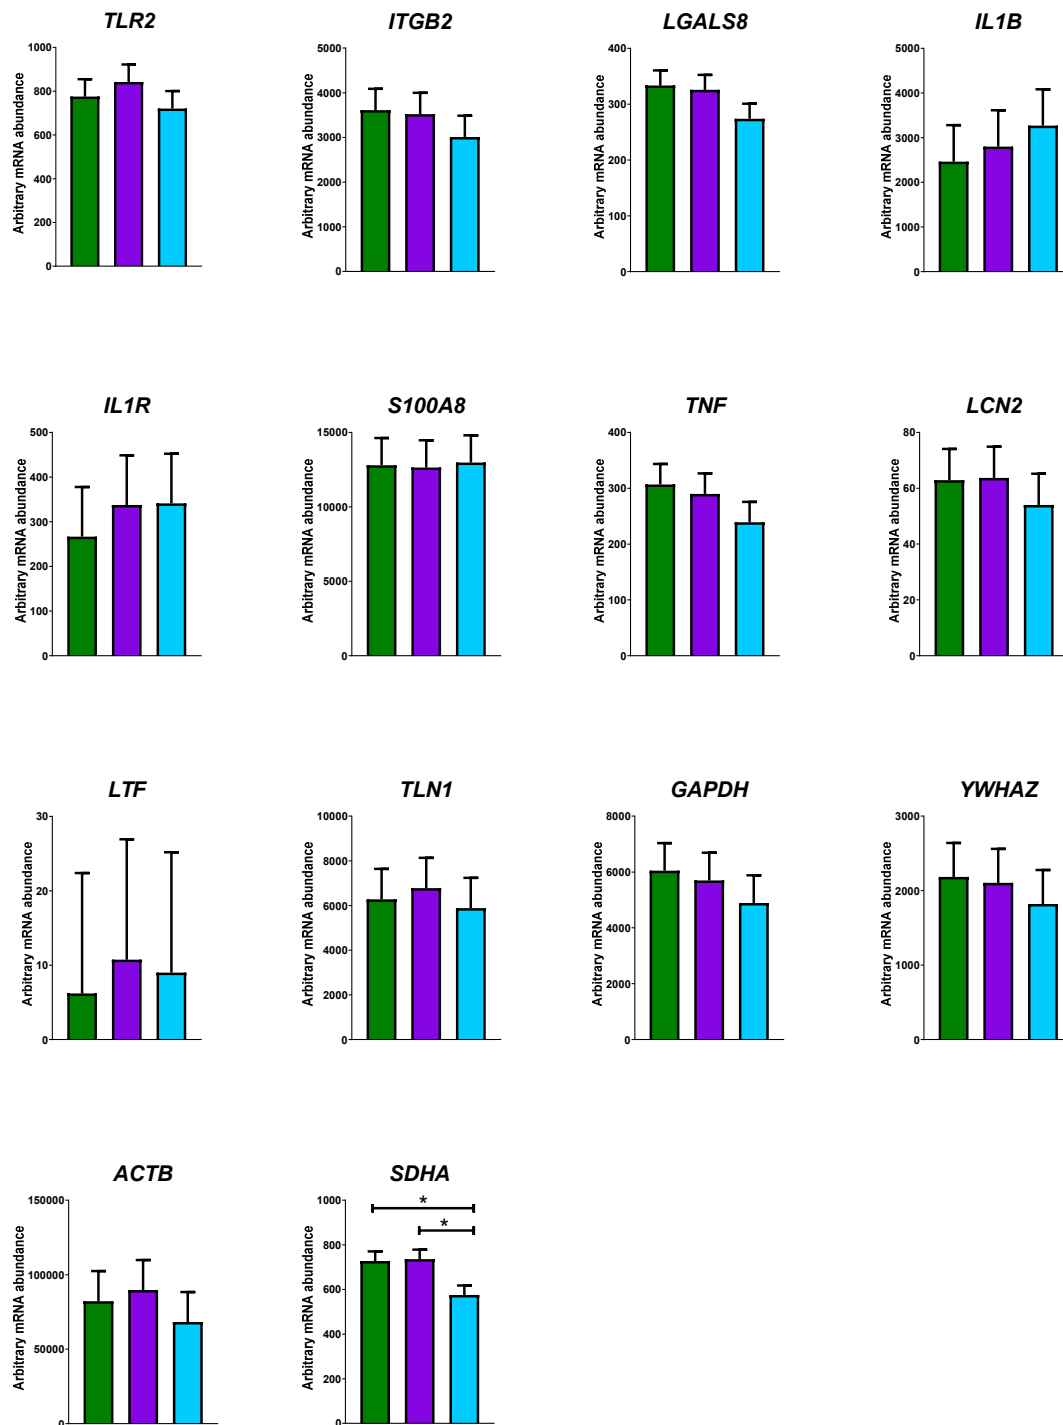

**Supplementary Figure S1.** Least square means  $\pm$  SEM of the arbitrary mRNA abundance of genes in leukocytes isolated from blood of mid-lactating Holstein cows collected in Li-heparin (green columns), K-EDTA (purple columns), or Na-citrate (light blue columns) tubes; \* indicate significant difference between anticoagulants ( $p < 0.05$ )
